# Supplementary material
Source: publisher figshare collection journal article supplement (https://frontiersin.figshare.com/ndownloader/files/11160374)
Supplement: Supplementary file [file 11160374]

**Supplementary Table 1.** Classification of patients with a suspicion of LRBA deficiency

| Group                     | Criteria                                                                                                                                                                                                                                                                                                                                                                                                                                                                                                                                                          |
|---------------------------|-------------------------------------------------------------------------------------------------------------------------------------------------------------------------------------------------------------------------------------------------------------------------------------------------------------------------------------------------------------------------------------------------------------------------------------------------------------------------------------------------------------------------------------------------------------------|
| <b>Possible</b>           | <p>Patients who met the following criteria are considered as suspected of LRBA deficiency:</p> <p>I. Unknown genetic cause of their disease and any of the following diagnosis: IIa. ALPS-phenotype (Autoimmune lymphoproliferative syndrome of undetermined genetic cause), IIb. CVID (Common Variable Immunodeficiency), IIc. Child-onset hypogammaglobulinemia, IId: early-onset Inflammatory Bowel Disease, i.e. age of onset &lt;10 years, and IIe: Autoimmune cytopenias of unknown etiology. III. Signed patient consent. IV. Availability of samples.</p> |
| <b>Probable</b>           | <p>Possible LRBA-deficient patients with absence or reduced LRBA protein expression tested by flow cytometry or Western blot, or as suggested here, with a LRBA-MFI ratio below 2.6</p>                                                                                                                                                                                                                                                                                                                                                                           |
| <b>Definitive</b>         | <p>Probable LRBA-deficient patients with biallelic mutations in <i>LRBA</i></p>                                                                                                                                                                                                                                                                                                                                                                                                                                                                                   |
| <b>Not LRBA-deficient</b> | <p>Patients with a suspicion of LRBA deficiency but with wild type sequence of <i>LRBA</i></p>                                                                                                                                                                                                                                                                                                                                                                                                                                                                    |
